# Supplementary material for: Statistical climatology of mid-latitude mesospheric summer echoescharacterised by OSWIN radar observations
Source: Copernicus journal article supplement (doi:10.5194/acp-2018-1027), 2018-12-05
Supplement: Supplementary file [file acp-2018-1027-AC2-supplement.pdf]

# Statistical climatology of mid-latitude mesospheric summer echoes characterised by OSWIN radar observations

Dimitry Pokhotelov<sup>1</sup>, Gunter Stober<sup>1</sup>, and Jorge L. Chau<sup>1</sup>

<sup>1</sup>Leibniz-Institute of Atmospheric Physics at the University of Rostock, Kühlungsborn, Germany

**Correspondence:** D. Pokhotelov (pokhotelov@iap-kborn.de)

**Abstract.** Mid-latitude mesospheric summer echoes (MSEs) appear in radar observations during summer months. The geophysical factors controlling the formation of MSEs include solar and energetic particle ionisation, neutral temperature, turbulence, and meridional transport. 12 years of summer month observations with the OSWIN radar in Kühlungsborn, Germany have been analysed to detect MSE events and to analyse statistical connections to these controlling factors. A more sensitive and consistent method for deriving signal-to-noise ratio has been utilised. Daily and monthly composite analysis demonstrates strong daytime preference and early summer seasonal preference for MSEs. The statistical results are not entirely conclusive due to the low occurrence rates of MSEs. Nevertheless, it is demonstrated that the meridional transport from colder high-latitude summer mesosphere is the important controlling factor, while no clear connection to geomagnetic and solar activity is found.

## 1 Introduction

Mesospheric echoes are strong radar echoes observed by very high frequency (VHF) radars within the ionospheric D-region at the altitudes of 80-90 km. While mesospheric echoes are observed at various latitudes from polar regions to the equator, this study specifically focuses on the summer observations over northern mid-latitude region, thus the term MSE refers here to the mid-latitude mesospheric summer echoes only. When observed at polar latitudes, the summer mesospheric echoes are typically referred as polar mesospheric summer echoes (PMSEs). The first observations of mid-latitude mesospheric summer echoes were reported near Göttingen, Germany (Czechowsky et al., 1979; Reid et al., 1989). Since that, comprehensive studies of (P)MSEs were conducted using various radar systems (Ecklund and Balsley, 1981; Thomas et al., 1992; Bremer et al., 2006; Morris et al., 2007; Latteck and Bremer, 2017). Simultaneous observations of (P)MSEs with radars, and Noctilucent Clouds (NLCs) with lidars (Nussbaumer et al., 1996; Thomas et al., 1996; Gerding et al., 2018) revealed that (P)MSEs and NLCs are closely-related phenomena linked to ice particles formed in the cold summer mesosphere. The current understanding of physical mechanisms leading to the formation of (P)MSEs is summarised in the review by Rapp and Lübken (2004).

Under sufficiently low temperatures, when ice particles are formed, enhanced levels of ionisation are needed to produce (P)MSEs. Consequently, (P)MSEs appear during summer months with cold upper mesosphere, and primarily under daylight conditions. D region ionisation could be enhanced by geomagnetic activity and resulting particle precipitation, suggesting connections to geomagnetic indices and solar energy flux. Meridional transport could bring colder air from polar mesosphere

to mid-latitudes, as well as to advect the existing PMSEs to mid-latitudes, suggesting connections to meridional mean winds and/or planetary waves.

Long-term VHF radar observations of PMSEs at polar latitudes in Andøya, Norway (Bremer et al., 2009; Latteck and Bremer, 2017) indicated dependence on geomagnetic activity, showing a pronounced positive correlation between the planetary activity index ( $A_p$ ) and the occurrence of PMSEs. A weaker correlation between the solar radiation flux and the occurrence of PMSEs was also reported (Latteck and Bremer, 2017). VHF radar observations of MSEs at mid-latitudes in Kühlungsborn, Germany (Latteck et al., 1999; Zecha et al., 2003; Zeller and Bremer, 2009; Zeller et al., 2009) demonstrated similar summer- and daylight-time preferences for mesospheric echoes. Similarly to PMSE, a dependence on global geomagnetic activity ( $A_p$  index) was found, as well as a weaker dependence on solar energy flux. However, the occurrence rates of MSEs appear substantially lower comparing to PMSEs, with maximum occurrence rates in summer months reaching  $\sim 90\%$  and  $30\%$  for PMSEs and MSEs, respectively. It has to be noted that earlier statistical studies of MSEs used relatively short datasets (less than one 11-year solar cycle), which in combination with low occurrence rate of MSEs results in poor statistics.

The purpose of the current study is to investigate long-term (12 years) observations of MSEs by OSWIN (Ostsee Wind radar) located in Kühlungsborn, Germany ( $54^\circ\text{N}$ ,  $12^\circ\text{E}$ ) in order to study statistical dependencies on geomagnetic and solar activity, seasonal and diurnal variabilities of MSEs, and dependencies on meridional transport. Since the OSWIN radar has undergone substantial hardware modifications during the observation period, a new method of absolute calibration, based on the cosmic noise intensity, has been applied throughout the OSWIN radar dataset. In addition to the global geomagnetic index, we also considered dependencies on auroral electrojet index and solar wind speed, which arguably provide better proxies for auroral and relativistic particle precipitation, respectively. In order to study the dependence on meridional transport, wind data from a specular meteor radar is used. We investigate which factors, besides solar irradiance, play significant roles in controlling the occurrence of MSEs.

## 2 Radar description and data analysis

OSWIN is the phased array VHF (53.5 MHz) radar in Kühlungsborn operated during summer months primarily to study MSEs. The dataset analysed here covers years 2004-2013 (with year 2009 missing) and years 2015-2017. In year 2014 the radar was not operational and the antenna array was substantially reconfigured. The technical specifications of both original and reconfigured OSWIN systems are given in Gerding et al. (2018). For the purposes of the current analysis only the vertical radar beam (of  $6^\circ$  beam width) has been used. OSWIN runs in synchronized operation with the nearby meteor radar receive-only station in Kühlungsborn.

The OSWIN raw data was processed by fitting a truncated Gaussian function to each spectrum obtained from the measured raw voltages (Kudeki et al., 1999; Sheth et al., 2006; Chau and Kudeki, 2006; Stober et al., 2018). Before the data fitting, 32 coherent and 8 incoherent integrations were used. The resulting spectra contained 256 points. Similar to Stober et al. (2018) we also removed potential meteor detections, including specular meteors as well as head echoes.

The MSE detection is based on a global sky noise estimate derived from all range gates between 50 to 120 km altitude where the truncated Gaussian fitting resulted in a SNR < -8 dB for each record. The global sky noise estimate allows to define a new  
5 SNR value for each record, which is then used further on to detect potential MSE events.

The available dataset has been processed to obtain hourly values of SNR, only for summer months (June-August). The detection of MSE is defined when the observed hourly value of SNR exceeds the SNR threshold. Note that the definition of SNR used in this study differs from the definition of SNR used in Gerding et al. (2018), and in earlier MSE studies with OSWIN (Bremer et al., 2006; Zeller et al., 2009). In the current analysis, once the hourly SNR value exceeds the threshold, the  
10 maximum SNR value in a vertical column between 75 and 93 km altitudes is considered as the SNR of detected MSE and the altitude of the maximum SNR value is considered as a height of the detected echo.

OSWIN radar does not provide continuous wind measurements. Meridional wind data for this study has been obtained from the VHF meteor radar located in Juliusruh, Germany (54°N, 13°E). While the meteor radar is not co-located with OSWIN, the zonal distance of 120 km is within a field of view of the meteor radar. The meteor radar provides hourly averaged wind  
15 values in the range of altitude between about 75 and 110 km using backscatter from meteor ionisation trails (e.g., Stober et al., 2017). For the statistical study the meridional wind values are taken at the altitude closest to the height of detected MSE. The statistical uncertainties in the meridional winds range within 1-5 m/s (Stober et al., 2017), with the largest uncertainties at the upper and lower edges of the meteor layer.

To analyse the effects of geomagnetic activity, the planetary 3-hour-range index ( $Kp$ ) is used to characterise the global geo-  
20 magnetic activity and the auroral electrojet ( $AE$ ) index is used to characterise the geomagnetic substorm-related activity, such as auroral particle precipitation and ionospheric Joule heating. The solar wind speed, measured in-situ on a spacecraft upstream from the Earth's magnetosphere (King and Papitashvili, 2005), is used as a proxy for the energetic electron precipitation from the Earth's outer radiation belts. The solar activity is characterised by the solar radio flux at 10.7 cm wavelength ( $F10.7$ ). For each hour of OSWIN observations the values of  $AE$ ,  $Kp$ ,  $V_{sw}$ , and  $F10.7$  are assigned using the NASA's OMNIWeb database.  
25 To avoid a contamination of the statistics by very small counts during extreme events, a threshold of  $\geq 5$  MSE detections is used here.

### 3 Statistical results and discussion

#### 3.1 Daily and monthly occurrences of MSEs

Superposed epoch analysis of the entire OSWIN dataset for each day of summer months has been done with respect to 00  
30 UTC time. The total occurrence of MSEs within each UTC hour, computed in percentage with respect to the total hours of observations, is shown in Panel A of Figure 1. Panels B, C, and D of Figure 1 show occurrences of MSEs during months of June, July, and August, respectively. As expected, there is a clear day-time preference for MSEs, though there is noticeable occurrence of MSEs during night hours as well.

In terms of monthly distribution, the maximum MSE occurrence is observed during June, with the occurrence diminishing in August. Such strong MSE preference for early summer, also noticed but unexplained by Bremer et al. (2006), is not seen in

long-term observations of PMSEs at polar latitudes (Bremer et al., 2006; Latteck and Bremer, 2017). In addition to the summer solstice conditions, the early summer preference could be attributed, at least in part, to the meridional wind climatology. Figure 5 2 shows the 10-year climatology of mean meridional winds observed by Juliusruh meteor radar (extracted using the procedure described by Stober et al. (2017)), indicating that the southward (negative) winds at the relevant altitudes ( $\sim 85$  km) are strongest in late June - early July (see further discussion in Section 3.3). The occurrence of MSEs, as a function of height and UTC, is shown in Figure 3. The predominant altitude of MSEs of  $\sim 85$  km is consistent with the earlier statistical analysis based on 3 years of OSWIN observations (Zecha et al., 2003).

10 Average occurrences of MSEs during each summer month of observations is shown in Figure 4 for all 12 years of OSWIN observations. While the MSE occurrence is always highest in June, there is noticeable variability from year to year, with some years (especially 2006) having smaller difference in occurrences between June and July. The reason for this variability is not clear, as it could be due to solar cycle effects, year-to-year variability in atmospheric circulation, and/or variable planetary wave activity. It has been suggested earlier that the increased planetary wave activity could play a role in the formation of MSEs by affecting the meridional transport (e.g., Zeller et al., 2009). However, an investigation of this possible connection is beyond the 15 scope of this paper, as it would require a rigorous analysis using global atmospheric circulation models.

### 3.2 Dependence on geomagnetic and solar activity

Dependencies of MSEs on geomagnetic and solar activity ( $AE$ ,  $Kp$ ,  $V_{sw}$ , and  $F10.7$ ) for the entire OSWIN dataset are illustrated in Figure 5. In Panels A-D of Figure 5, the number of counts of MSE observations in a specific bin is shown by red bars, as well as the number of total observation hours, divided by a factor of five (blue bars). It is clear that the distribution of counts with detected MSEs resembles the distribution of total counts, indicating **only** weak or no dependence on geomagnetic and solar conditions. **The corresponding Pearson correlation coefficients ( $R^2$ ) between MSE occurrences and the values of  $AE$ ,  $Kp$ ,  $V_{sw}$ , and  $F10.7$  are 0.11, 0.17, 0.06, and 0.02, respectively.** A distribution of MSE occurrences is shown in Panels E-H of Figure 5. No clear dependence on the solar radio flux is seen, though there is a **weak** correlation with  $Kp$  values (masked by low count threshold, as discussed below), which is generally consistent with earlier studies (Bremer et al., 2006; Zeller and Bremer, 2009). The relevance of planetary  $Kp$  index for the formation of (P)MSE, suggested in earlier studies (e.g., Bremer et al., 2006), is not obvious as the ionisation of ionospheric D layer requires high energy of precipitating particles, e.g., electrons with energies above 50 keV would be needed to produce substantial ionisation at altitude of  $\sim 85$  km (Turunen et al., 2009). While strong geomagnetic storms could produce these energies of precipitation at polar- and sometimes at mid-latitudes, such 25 events are rare and have spring/autumn seasonal preference (e.g., Gonzalez et al., 1994), and thus should have only marginal impact on the MSE statistics. In this study the effects of strong storms are manifested by higher occurrences of MSEs at  $Kp > 7$ , but they do not appear in Figure 5 due to the low event count ( $< 5$  events). Energetic precipitation (100 keV and above) from the Earth's outer radiation belts **is** known to be correlated with high speed solar wind intervals (Mathie and Mann, 2001; Meredith et al., 2011), which are frequent recurring phenomena and not necessarily manifested by high  $Kp$  (Tsurutani et al., 2006). Thus the solar wind speed ( $V_{sw}$ ) is expected to be a better proxy for the high energy precipitation effects. In addition, 30

the auroral electrojet index ( $AE$ ) could be a good indicator for auroral precipitation (at least at high latitudes), as well as for high speed solar stream related effects manifested by high  $AE$  intervals (Tsurutani et al., 2006).

MSE counts and occurrences shown in Figure 5, Panels C and G respectively, suggest that there is no clear dependence on the  $AE$  index. The dependence on the solar wind speed (Figure 5, Panels D and H) is more clear, with higher occurrences of MSEs at  $V_{sw} > 500$  km/s, i.e. under the solar wind regime dominated by fast solar wind (Bothmer et al., 2007). However, the low values of correlation coefficients indicate overall insignificant dependencies. A weak connection to the geomagnetic activity is likely to be related to: (a) low occurrence rates of MSEs leading to poor statistics, not well representing geomagnetically disturbed periods; and (b) mid-latitudes being too remote to be directly affected by geomagnetic activity, with an exception of energetic particle precipitation from the outer radiation belts (which may also explain relatively stronger correlation with  $V_{sw}$ ). Taking (a) and (b) into account, it is advisable to conduct a statistical study using radar observations of PMSEs at high latitudes, following the methodology described here, instead of using the  $Kp$  index alone as in earlier studies (e.g., Bremer et al., 2006; Latteck and Bremer, 2017).

It needs to be mentioned that the connections between radar-observed mesospheric echoes and D-region electron density enhancements during geomagnetic disturbances remain controversial. While it is generally accepted that (P)MSEs require enhanced levels of ionisation (Rapp and Lübken, 2004), observations during the July 2000 major solar flare event with different radars at polar latitudes (Rapp et al., 2002; Barabash et al., 2004) surprisingly shown anti-correlations between the PMSE strength and the D-region electron densities. To explain the controversy, Chau et al. (2014) suggested that an interplay between the Faraday rotation and the D-layer absorption effects could diminish a correlation between the geomagnetic activity and the PMSE strength observed by VHF radars. Clearly this topic requires further studies with different radar systems at polar latitudes, that are beyond the scope of this article.

### 3.3 Dependence on meridional transport

Dependencies on meridional wind values are illustrated in Figure 6. The values of meridional winds observed at the altitudes of detected MSEs are binned in the range of  $\pm 80$  m/s (with negative winds directed equatorward). In Panels A-D of Figure 6, the number of counts of MSE observations in a specific velocity bin is shown (red bars), as well as the number of total observation hours, divided by a factor of five (blue bars). In Panels E-H of Figure 6 the occurrences of MSEs are shown in each velocity bin. Assuming possible meridional advection times of 12-24 hrs, the observed meridional winds averaged over previous 6 hrs, 12 hrs, and 24 hrs, are shown respectively, in Panels B, C, and D of Figure 6. The narrowing of the wind distribution, as the wind averaging interval increases from 6 hrs to 24 hrs, is likely due to the temporal filtering-off of terdiurnal and semidiurnal tidal components. It is clear that the distribution of counts with detected MSEs is shifted towards the negative wind values by 10-15 m/s, and the occurrence of MSEs maximises at strongly negative wind values ( $\sim -30$  m/s). This indicates the importance of the meridional transport for the formation of MSEs. The corresponding Pearson correlation coefficients between MSE occurrences and the values of meridional winds averaged over previous 1hr, 6 hrs, 12 hrs, and 24 hrs are 0.46, 0.93, 0.93, and 0.95, respectively. It has to be noted that the mean winds are generally southward during summer months, with climatological values of  $\sim -15$  m/s (see Figure 2).

The proposed mechanism for the influence of meridional winds involves colder summer mesospheric air being advected southward from polar latitudes, bringing the local temperatures below the freezing point and allowing ice crystals to be formed or sustained, which is necessary for MSEs (Rapp and Lübken, 2004). The formation of MSEs is expected to happen in the course of this advection, with relevant transport times of  $\sim 24$  hrs, as illustrated by the analysis of NLC transport (Kiliani et al., 2013). Satellite observations of the mesospheric temperatures, water vapour, and NLCs (Hervig et al., 2016), combined with ground observations in Kühlungsborn, also suggest the temperature and the meridional transport to be the key factors in controlling the NLC occurrence at mid-latitudes. Thus it is reasonable to assume that the meridional advection plays the key role in the formation of MSEs, also contributing to the observed early summer preference for the MSEs.

#### 4 Summary

12 years of summer-time observations of MSEs with the OSWIN VHF radar have been analysed to study the physical mechanisms responsible for the formation of mesospheric echoes. With the MSE detection procedure based on a global sky noise estimate we were able to analyse the entire dataset with the same sensitivity threshold, though the OSWIN radar has been substantially reconfigured over the time period. The dataset is examined statistically to establish the main factors controlling the MSE occurrence, including time of a day, period of summer, geomagnetic and solar activity, and meridional wind regime. The main conclusions can be summarised as follows.

- In agreement with earlier studies, the occurrence of MSEs is substantially lower relative to the occurrence of PMSEs reported at polar latitudes. The occurrence of MSEs shows strong daylight preference, though a finite number of MSE events also appears under dark conditions. A more sensitive detection method used in this study facilitates the detections of these night-time echoes. Monthly composite analysis indicates strong preferences of MSEs for early summer months, especially for June, which can be explained by a combination of the summer solstice conditions and the most favourable conditions for the southward meridional transport.
- No clear connection between the occurrence of MSEs, and solar and geomagnetic indices has been found. In addition to the dependencies on planetary  $Kp$  index, investigated earlier, we investigated the dependence on the auroral electrojet index and solar wind speed. The observed correlations with solar and geomagnetic conditions appear weak and insignificant. The connection to geomagnetic activity remains controversial and it needs to be investigated further using PMSE observations with different radars at polar latitudes, where the occurrences of mesospheric echoes are higher.
- Clear MSE preferences for stronger southward meridional winds are indicated, especially pronounced when the meridional winds are averaged over the previous 12-24 hrs interval, i.e. when the contribution of terdiurnal and semidiurnal (dominant) tides averages out. The suggested explanation is that the colder summer mesospheric air from higher latitudes is effectively transported southwards, with MSEs forming in the process. This interpretation appears consistent with satellite observations of NLC clouds and their environment, and with the previous results of the numerical modelling of NLC cloud transport.

## **Data availability**

The OSWIN radar data and the Juliusruh meteor radar wind data are available upon request to Gunter Stober (stober@iap-kborn.de). Geomagnetic indices,  $F_{10.7}$  solar flux, and solar wind data were obtained from the NASA's OMNIWeb database (<http://omniweb.gsfc.nasa.gov>).

- 5 *Author contributions.* OSWIN radar raw data and meteor radar raw data were processed by GS. Statistical analysis of radar data and solar/geomagnetic activity data was conducted by DP in consultation with JLC and GS. DP prepared the manuscript with contributions from all co-authors.

*Competing interests.* The authors declare that they have no conflict of interest.

## References

- 10 Barabash, V., Kirkwood, S., Feofilov, A., and Kutepov, A.: Polar mesosphere summer echoes during the July 2000 solar proton event, *Annales Geophysicae*, 22, 759–771, <https://doi.org/10.5194/angeo-22-759-2004>, 2004.
- Bothmer, V., Daglis, I. A., and Bogdan, T. J.: Space Weather: Physics and Effects, *Physics Today*, 60, 59, <https://doi.org/10.1063/1.2825074>, 2007.
- Bremer, J., Hoffmann, P., Höffner, J., Latteck, R., Singer, W., Zecha, M., and Zeller, O.: Long-term changes of mesospheric summer echoes at polar and middle latitudes, *Journal of Atmospheric and Solar-Terrestrial Physics*, 68, 1940–1951, <https://doi.org/10.1016/j.jastp.2006.02.012>, 2006.
- 15 Bremer, J., Hoffmann, P., Latteck, R., Singer, W., and Zecha, M.: Long-term changes of (polar) mesosphere summer echoes, *Journal of Atmospheric and Solar-Terrestrial Physics*, 71, 1571–1576, <https://doi.org/10.1016/j.jastp.2009.03.010>, 2009.
- Chau, J. L. and Kudeki, E.: First E- and D-region incoherent scatter spectra observed over Jicamarca, *Annales Geophysicae*, 24, 1295–1303, 20  
<https://doi.org/10.5194/angeo-24-1295-2006>, 2006.
- Chau, J. L., Röttger, J., and Rapp, M.: PMSE strength during enhanced D region electron densities: Faraday rotation and absorption effects at VHF frequencies, *Journal of Atmospheric and Solar-Terrestrial Physics*, 118, 113–118, <https://doi.org/10.1016/j.jastp.2013.06.015>, 2014.
- Czechowsky, P., Ruester, R., and Schmidt, G.: Variations of mesospheric structures in different seasons, *Geophysical Research Letters*, 6, 459–462, <https://doi.org/10.1029/GL006i006p00459>, 1979.
- 25 Ecklund, W. L. and Balsley, B. B.: Long-term observations of the Arctic mesosphere with the MST radar at Poker Flat, Alaska, *Journal of Geophysical Research*, 86, 7775–7780, <https://doi.org/10.1029/JA086iA09p07775>, 1981.
- Gerding, M., Zöllner, J., Zecha, M., Baumgarten, K., Höffner, J., Stober, G., and Lübken, F.-J.: Simultaneous observations of NLCs and MSEs at midlatitudes: Implications for formation and advection of ice particles, *Atmospheric Chemistry and Physics*, 18, 15 569–15 580, <https://doi.org/10.5194/acp-2018-566>, <https://doi.org/10.5194/acp-18-15569-2018>, 2018.
- 30 Gonzalez, W. D., Joselyn, J. A., Kamide, Y., Kroehl, H. W., Rostoker, G., Tsurutani, B. T., and Vasyliunas, V. M.: What is a geomagnetic storm?, *Journal of Geophysical Research*, 99, 5771–5792, <https://doi.org/10.1029/93JA02867>, 1994.
- Hervig, M. E., Gerding, M., Stevens, M. H., Stockwell, R., Bailey, S. M., Russell, J. M., and Stober, G.: Mid-latitude mesospheric clouds and their environment from SOFIE observations, *Journal of Atmospheric and Solar-Terrestrial Physics*, 149, 1–14, <https://doi.org/10.1016/j.jastp.2016.09.004>, 2016.
- 35 Kiliani, J., Baumgarten, G., Lübken, F. J., Berger, U., and Hoffmann, P.: Temporal and spatial characteristics of the formation of strong noctilucent clouds, *Journal of Atmospheric and Solar-Terrestrial Physics*, 104, 151–166, <https://doi.org/10.1016/j.jastp.2013.01.005>, 2013.
- King, J. H. and Papitashvili, N. E.: Solar wind spatial scales in and comparisons of hourly Wind and ACE plasma and magnetic field data, *Journal of Geophysical Research (Space Physics)*, 110, A02104, <https://doi.org/10.1029/2004JA010649>, 2005.
- Kudeki, E., Bhattacharyya, S., and Woodman, R. F.: A new approach in incoherent scatter F region  $E \times B$  drift measurements at Jicamarca, *Journal of Geophysical Research: Space Physics*, 104, 28 145–28 162, <https://doi.org/10.1029/1998JA900110>, 1999.
- 5 Latteck, R. and Bremer, J.: Long-term variations of polar mesospheric summer echoes observed at Andøya (69°N), *Journal of Atmospheric and Solar-Terrestrial Physics*, 163, 31–37, <https://doi.org/10.1016/j.jastp.2017.07.005>, 2017.
- Latteck, R., Singer, W., and Höffner, J.: Mesosphere summer echoes as observed by VHF radar at Kühlungsborn (54°N), *Geophysical Research Letters*, 26, 1533–1536, <https://doi.org/10.1029/1999GL900225>, 1999.



- Mathie, R. A. and Mann, I. R.: On the solar wind control of Pc5 ULF pulsation power at mid-latitudes: Implications for MeV electron acceleration in the outer radiation belt, *Journal of Geophysical Research*, 106, 29 783–29 796, <https://doi.org/10.1029/2001JA000002>, 2001.
- 10 Meredith, N. P., Horne, R. B., Lam, M. M., Denton, M. H., Borovsky, J. E., and Green, J. C.: Energetic electron precipitation during high-speed solar wind stream driven storms, *Journal of Geophysical Research (Space Physics)*, 116, A05223, <https://doi.org/10.1029/2010JA016293>, 2011.
- 15 Morris, R. J., Murphy, D. J., Klekociuk, A. R., and Holdsworth, D. A.: First complete season of PMSE observations above Davis, Antarctica, and their relation to winds and temperatures, *Geophysical Research Letters*, 34, L05805, <https://doi.org/10.1029/2006GL028641>, 2007.
- Nussbaumer, V., Fricke, K. H., Langer, M., Singer, W., and von Zahn, U.: First simultaneous and common volume observations of noctilucent clouds and polar mesosphere summer echoes by lidar and radar, *Journal of Geophysical Research*, 101, 19 161–19 168, <https://doi.org/10.1029/96JD01213>, 1996.
- 20 Rapp, M. and Lübken, F.-J.: Polar mesosphere summer echoes (PMSE): Review of observations and current understanding, *Atmospheric Chemistry and Physics*, 4, 2601–2633, <https://doi.org/10.5194/acp-4-2601-2004>, <https://www.atmos-chem-phys.net/4/2601/2004/>, 2004.
- Rapp, M., Gumbel, J., Lübken, F. J., and Latteck, R.: D region electron number density limits for the existence of polar mesosphere summer echoes, *Journal of Geophysical Research (Atmospheres)*, 107, 4187, <https://doi.org/10.1029/2001JD001323>, 2002.
- Reid, I. M., Czechowsky, P., Ruester, R., and Schmidt, G.: First VHF radar measurements of mesopause summer echoes at mid-latitudes, *Geophysical Research Letters*, 16, 135–138, <https://doi.org/10.1029/GL016i002p00135>, 1989.
- 25 Sheth, R., Kudeki, E., Lehmacher, G., Sarango, M., Woodman, R., Chau, J., Guo, L., and Reyes, P.: A high-resolution study of mesospheric fine structure with the Jicamarca MST radar, *Annales Geophysicae*, 24, 1281–1293, <https://doi.org/10.5194/angeo-24-1281-2006>, 2006.
- Stober, G., Matthias, V., Jacobi, C., Wilhelm, S., Höffner, J., and Chau, J. L.: Exceptionally strong summer-like zonal wind reversal in the upper mesosphere during winter 2015/16, *Annales Geophysicae*, 35, 711–720, <https://doi.org/10.5194/angeo-35-711-2017>, 2017.
- 30 Stober, G., Sommer, S., Schult, C., Latteck, R., and Chau, J. L.: Observation of Kelvin–Helmholtz instabilities and gravity waves in the summer mesopause above Andenes in Northern Norway, *Atmospheric Chemistry and Physics*, 18, 6721–6732, <https://doi.org/10.5194/acp-18-6721-2018>, 2018.
- Thomas, L., Astin, I., and Prichard, I. T.: The characteristics of VHF echoes from the summer mesopause region at mid-latitudes, *Journal of Atmospheric and Terrestrial Physics*, 54, 969–977, [https://doi.org/10.1016/0021-9169\(92\)90063-Q](https://doi.org/10.1016/0021-9169(92)90063-Q), 1992.
- 35 Thomas, L., Marsh, A. K. P., Wareing, D. P., Astin, I., and Chandra, H.: VHF echoes from the midlatitude mesosphere and the thermal structure observed by lidar, *Journal of Geophysical Research*, 101, 12,867–12,877, <https://doi.org/10.1029/96JD00218>, 1996.
- Tsurutani, B. T., Gonzalez, W. D., Gonzalez, A. L. C., Guarnieri, F. L., Gopalswamy, N., Grande, M., Kamide, Y., Kasahara, Y., Lu, G., Mann, I., McPherron, R., Soraas, F., and Vasyliunas, V.: Corotating solar wind streams and recurrent geomagnetic activity: A review, *Journal of Geophysical Research (Space Physics)*, 111, A07S01, <https://doi.org/10.1029/2005JA011273>, 2006.
- Turunen, E., Verronen, P. T., Seppälä, A., Rodger, C. J., Clilverd, M. A., Tamminen, J., Enell, C.-F., and Ulich, T.: Impact of different energies of precipitating particles on NO<sub>x</sub> generation in the middle and upper atmosphere during geomagnetic storms, *Journal of Atmospheric and Solar-Terrestrial Physics*, 71, 1176–1189, <https://doi.org/10.1016/j.jastp.2008.07.005>, 2009.
- Zecha, M., Bremer, J., Latteck, R., Singer, W., and Hoffmann, P.: Properties of midlatitude mesosphere summer echoes after three seasons of VHF radar observations at 54°N, *Journal of Geophysical Research (Atmospheres)*, 108, 8439, <https://doi.org/10.1029/2002JD002442>, 2003.

- Zeller, O. and Bremer, J.: The influence of geomagnetic activity on mesospheric summer echoes in middle and polar latitudes, *Annales Geophysicae*, 27, 831–837, <https://doi.org/10.5194/angeo-27-831-2009>, 2009.
- Zeller, O., Hoffmann, P., Bremer, J., and Singer, W.: Mesosphere summer echoes, temperature, and meridional wind variations at mid- and polar latitudes, *Journal of Atmospheric and Solar-Terrestrial Physics*, 71, 931–942, <https://doi.org/10.1016/j.jastp.2009.03.013>, 2009.

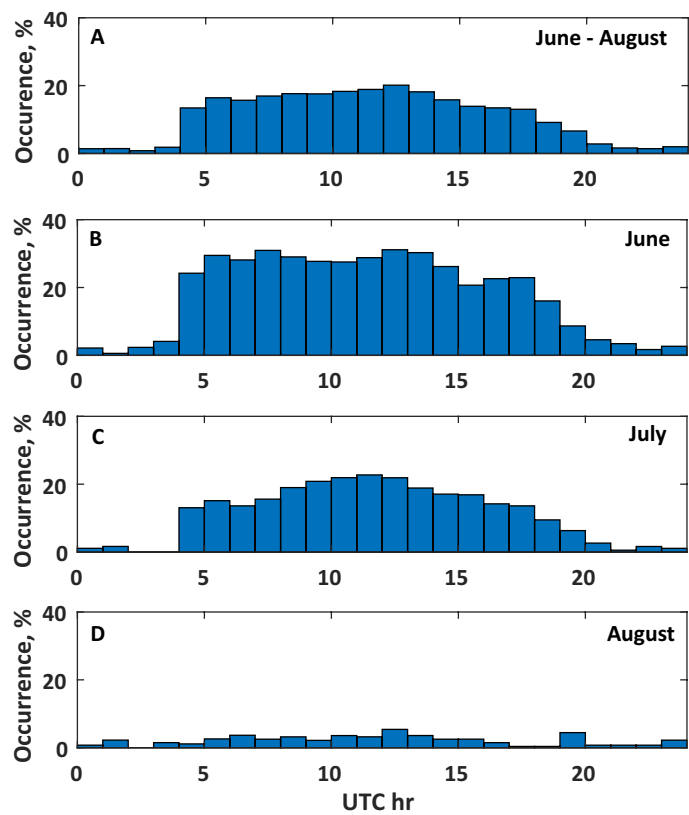

**Figure 1.** 24-hour composites of MSE occurrences (with respect to 00 UTC time) for all days of summer (Panel A), and the days of June, July, and August (Panels B, C, and D, respectively).

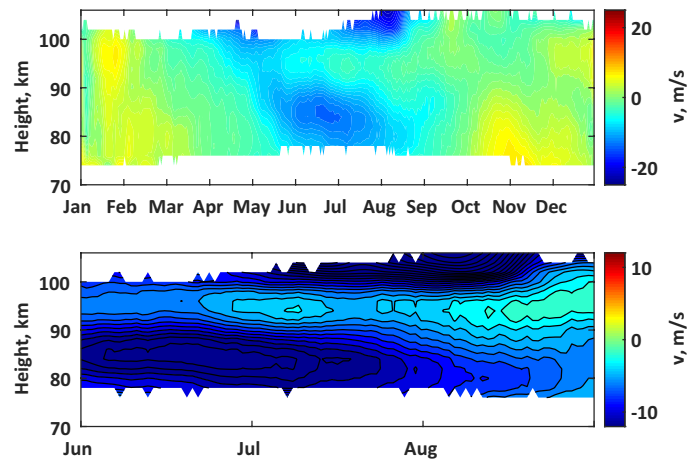

**Figure 2.** Climatology of meridional mean winds obtained from Juliusruh meteor radar observations over years 2007-2016. Top panel shows climatology for the entire year, bottom panel shows climatology for summer months only.

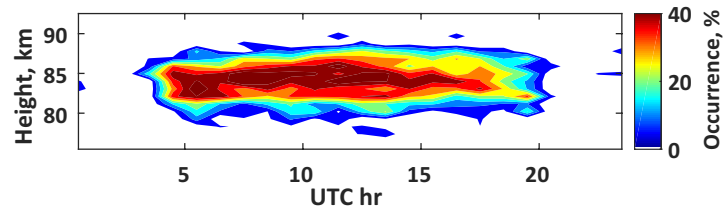

**Figure 3.** 24-hour composites of MSE occurrences as function of UTC time and the height of detected echoes.

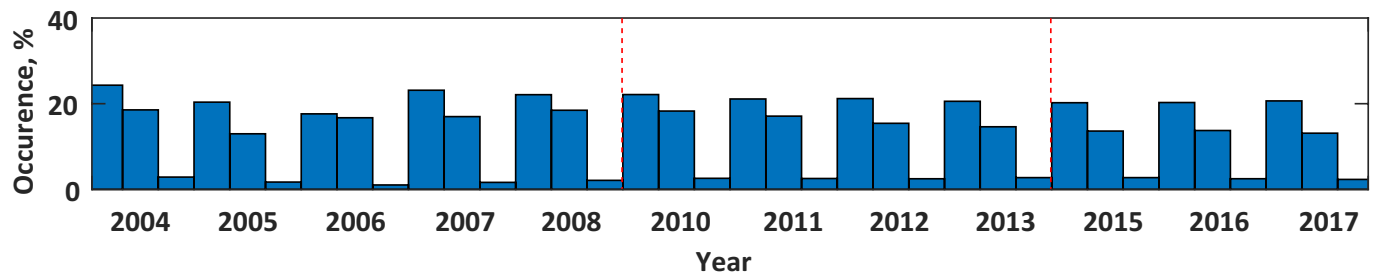

**Figure 4.** Occurrences of MSEs during each month of OSWIN observations. Blue bars show occurrences during June, July, and August of each year, with the maximum occurrence always in June. Red vertical dashed lines indicate the two missing years (2009 and 2014).

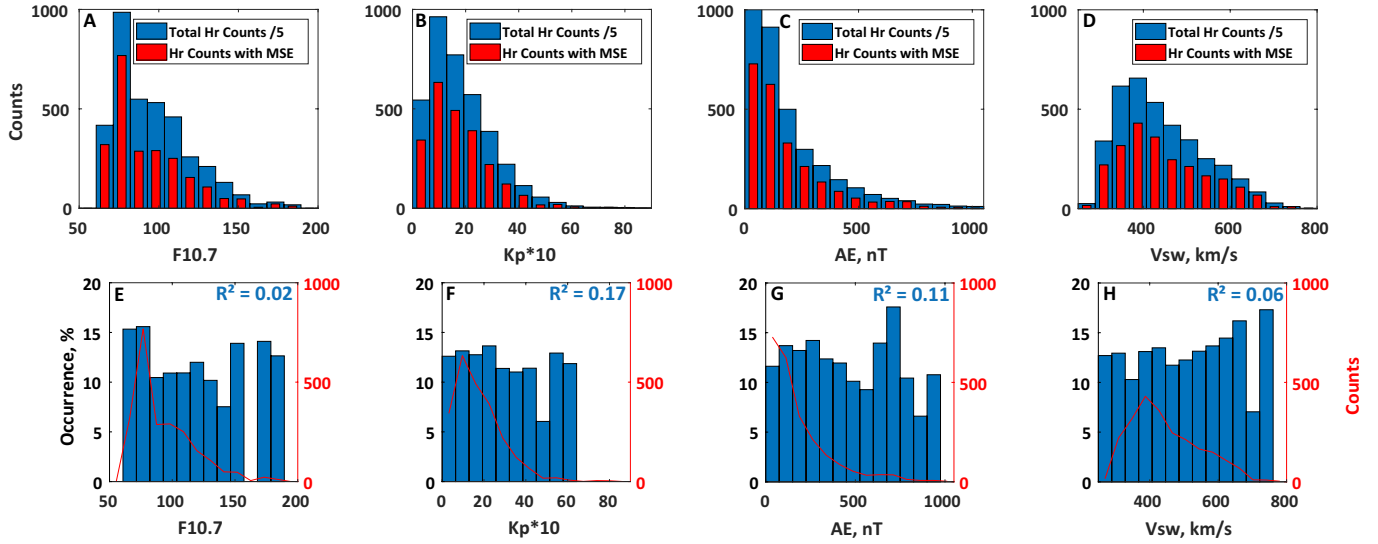

**Figure 5.** Dependencies of MSEs on solar and geomagnetic activity, manifested by 10.7 cm solar radio flux  $F10.7$  in solar flux units (Panels A, E), planetary 3-hour-range index  $Kp$  (Panels B, F), auroral electrojet index  $AE$  (Panels C, G), and solar wind speed  $V_{SW}$  (Panels D, H). In the top row (Panels A-D), the total counts of OSWIN observation hours is shown by blue bars, and the counts of hours with MSEs detected is shown by red bars (note that the number of total counts is divided by a factor of 5). In the bottom row (Panels E-H), the occurrences of MSEs in each bin of solar/geomagnetic indices are shown by blue bars, and the red lines indicate the number of counts with MSEs detected. Correlation coefficients between the occurrence of MSEs and solar/geomagnetic indices are shown by blue numbers.

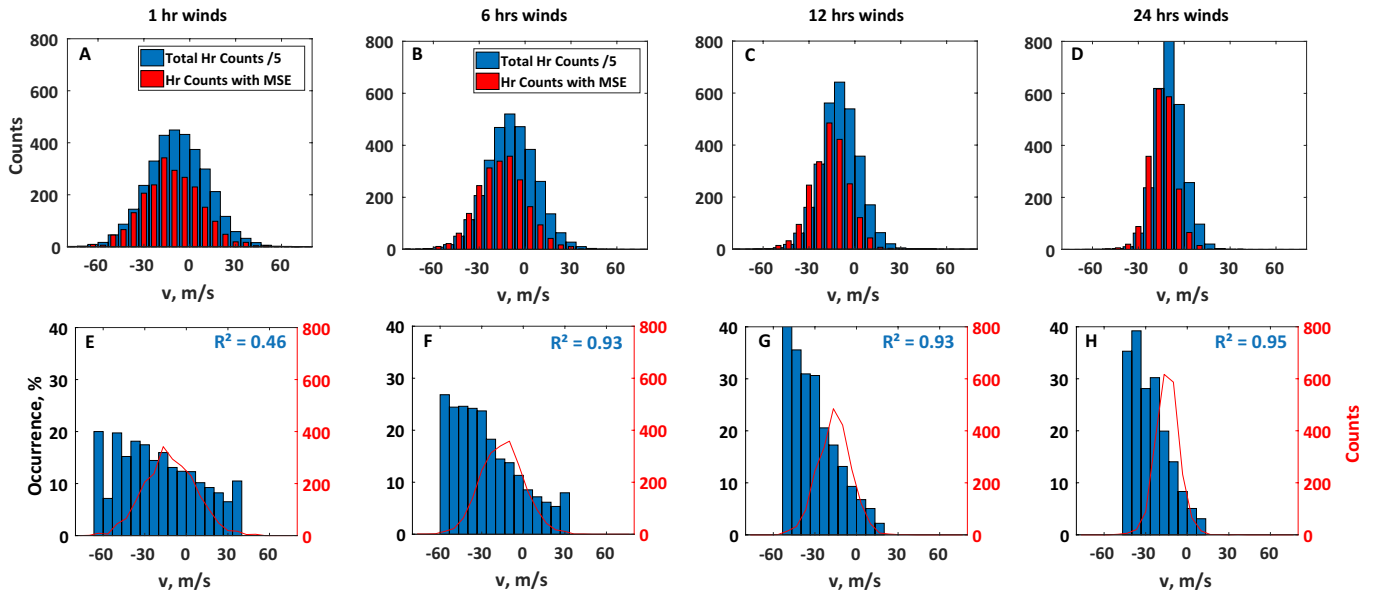

**Figure 6.** Dependencies of MSEs on meridional transport, quantified by the hourly meridional winds obtained by the Juliusruh meteor radar. In the top row (Panels A-D), the total counts of OSWIN observation hours (divided by a factor of 5) are shown by blue bars for each bin of meridional wind speed, and the counts of hours with MSEs detected are shown by red bars. In the bottom row (Panels E-H), the occurrences of MSEs vs meridional wind are shown by blue bars, and the red lines indicate the number of counts with MSEs detected. **Correlation coefficients between the occurrence of MSEs and meridional winds are shown by blue numbers.**
